# Supplementary material
Source: MDPI journal article supplement (https://www.mdpi.com/1999-4907/15/4/684)
Supplement: s1 [file s1]

# Supplementary Materials

**Table S1.** Responses of aboveground variables of *P. amabilis* to light intensity, water addition, groundwater level, fertilizer type, and rhizosphere soil type.

| Response Variable      | Levels of Treatments        | Soil Physical and Chemical Indexes |                            |             |                            |                                         |                     |                                 |                                   |                                  |
|------------------------|-----------------------------|------------------------------------|----------------------------|-------------|----------------------------|-----------------------------------------|---------------------|---------------------------------|-----------------------------------|----------------------------------|
|                        |                             | Soil Temperature (°C)              | Soil Water Content (v/v %) | Soil pH     | NO <sub>3</sub> -N (mg/kg) | NH <sub>4</sub> <sup>+</sup> -N (mg/kg) | Inorganic N (mg/kg) | Soil Total Nitro-<br>gen (g/kg) | Soil Total Phos-<br>phorus (g/kg) | Soil Total Potas-<br>sium (g/kg) |
| Light intensity (%)    | 8.5                         |                                    |                            | 5.3 ± 0.3bc | 0.6 ± 0.2a                 | 2.4 ± 0.7c                              | 3 ± 0.6b            | 1.9 ± 0.1ab                     | 1.9 ± 0.0a                        |                                  |
|                        | 15                          |                                    |                            | 5.4 ± 0.2b  | 0.8 ± 0.1a                 | 4.9 ± 1.2ab                             | 5.7 ± 1.1ab         | 1.9 ± 0.1a                      | 1.9 ± 0.1a                        |                                  |
|                        | 28                          |                                    |                            | 5.1 ± 0.2c  | 0.8 ± 0.1a                 | 4.3 ± 0.4ab                             | 5.1 ± 0.4ab         | 1.9 ± 0.1a                      | 2.0 ± 0.1a                        |                                  |
|                        | 75                          |                                    |                            | 5.7 ± 0.3a  | 0.5 ± 0.2b                 | 6.7 ± 1.9a                              | 7.1 ± 1.9a          | 1.9 ± 0.1ab                     | 1.9 ± 0.1a                        |                                  |
|                        | 100 (Control)               |                                    |                            | 5.4 ± 0.1b  | 0.7 ± 0.1a                 | 5.4 ± 0.9ab                             | 6.1 ± 1ab           | 1.8 ± 0.2b                      | 1.8 ± 0.2b                        |                                  |
| Water addition (mm)    | 800                         |                                    |                            |             | 0.7 ± 0.2a                 | 3.9 ± 0.7a                              | 4.6 ± 0.8a          | 1.9 ± 0.12ab                    | 1.9 ± 0.2ab                       | 17.2 ± 0.2ab                     |
|                        | 1200                        |                                    |                            |             | 0.7 ± 0.2a                 | 4.2 ± 0.8a                              | 4.8 ± 0.8a          | 2.0 ± 0.1a                      | 2.0 ± 0.0a                        | 17.3 ± 0.1a                      |
|                        | 1600 (Control)              |                                    |                            |             | 0.7 ± 0.1a                 | 4.7 ± 0.8a                              | 5.5 ± 0.9a          | 1.9 ± 0.1ab                     | 1.9 ± 0.0ab                       | 17.2 ± 0.1ab                     |
|                        | 2000                        |                                    |                            |             | 0.6 ± 0.1a                 | 6.3 ± 1.8a                              | 6.9 ± 1.7a          | 1.8 ± 0.1b                      | 1.8 ± 0.1b                        | 17.1 ± 0.1c                      |
|                        | 2400                        |                                    |                            |             | 0.6 ± 0.1a                 | 4.6 ± 1.5a                              | 5.2 ± 1.4a          | 1.8 ± 0.1b                      | 1.8 ± 0.1b                        | 17.1 ± 0.1c                      |
| Groundwater level (cm) | 0 (Control)                 |                                    |                            |             | 0.8 ± 0.1a                 | 2.8 ± 0.3b                              | 3.6 ± 0.4a          | 1.6 ± 0.2d                      | 1.6 ± 0.1b                        |                                  |
|                        | 7                           |                                    |                            |             | 0.9 ± 0.1a                 | 4.6 ± 0.8ab                             | 5.4 ± 0.8a          | 1.9 ± 0.1ab                     | 1.9 ± 0.1a                        |                                  |
|                        | 14                          |                                    |                            |             | 0.9 ± 0.1a                 | 5.2 ± 1.6ab                             | 6 ± 1.5a            | 2.0 ± 0.1a                      | 2.0 ± 0.1a                        |                                  |
|                        | 21                          |                                    |                            |             | 0.5 ± 0.2b                 | 4.1 ± 0.8ab                             | 4.6 ± 0.8a          | 2.0 ± 0.1ab                     | 2.0 ± 0.1a                        |                                  |
|                        | 28                          |                                    |                            |             | 0.3 ± 0.1c                 | 7.1 ± 1.6a                              | 7.3 ± 1.7a          | 1.9 ± 0.1c                      | 1.9 ± 0.0a                        |                                  |
| Fertilizer type        | River sand (Control)        | 28.3 ± 0.2a                        | 27.8 ± 0.6b                |             | 0.1 ± 0c                   | 5 ± 1.6a                                | 5.1 ± 1.6a          |                                 |                                   |                                  |
|                        | Urea                        | 28.1 ± 0.2a                        | 28.9 ± 0.4a                |             | 0.9 ± 0.1a                 | 4.3 ± 0.9a                              | 5.3 ± 0.9a          |                                 |                                   |                                  |
|                        | Compound fertilizer (N-P-K) | 28.1 ± 0.2a                        | 28 ± 0.5b                  |             | 0.8 ± 0.1a                 | 3.7 ± 1.1a                              | 4.5 ± 1.1a          |                                 |                                   |                                  |
| Rhizosphere soil type  | Cow manure                  | 28.3 ± 0.2a                        | 29.3 ± 0.5a                |             | 0.6 ± 0.2b                 | 5.1 ± 0.9a                              | 5.7 ± 0.9a          |                                 |                                   |                                  |
|                        | Rapeseed cake               | 28.1 ± 0.2a                        | 28.2 ± 0.5b                |             | 0.9 ± 0.1a                 | 5.6 ± 1.4a                              | 6.4 ± 1.3a          |                                 |                                   |                                  |
|                        | River sand (Control)        | 28.4 ± 0.2a                        | 26.9 ± 0.6b                |             | 0.6 ± 0.1bc                | 4.1 ± 1.4a                              | 4.7 ± 1.4a          | 1.7 ± 0.2c                      | 1.7 ± 0.1c                        | 17.0 ± 0.2d                      |
|                        | P.M.                        | 28.2 ± 0.2a                        | 28.8 ± 0.5a                |             | 0.6 ± 0.1bc                | 5.3 ± 1.1a                              | 5.9 ± 1.1a          | 1.9 ± 0.1b                      | 1.9 ± 0.1b                        | 17.1 ± 0.10c                     |
|                        | C.C.                        | 28.1 ± 0.2a                        | 28.5 ± 0.5a                |             | 0.9 ± 0.1a                 | 4 ± 0.7a                                | 4.9 ± 0.8a          | 1.9 ± 0.1ab                     | 1.9 ± 0.0ab                       | 17.2 ± 0.1ab                     |
|                        | Mixed                       | 28.2 ± 0.2a                        | 28.8 ± 0.5a                |             | 0.5 ± 0.1c                 | 5.5 ± 1.6a                              | 6 ± 1.6a            | 1.9 ± 0.1ab                     | 1.9 ± 0.1ab                       | 17.2 ± 0.1ab                     |
|                        | P.A.                        | 28.1 ± 0.2a                        | 29.1 ± 0.5a                |             | 0.7 ± 0.1b                 | 4.8 ± 1.1a                              | 5.5 ± 1.1a          | 2.0 ± 0.1a                      | 2.0 ± 0.1a                        | 17.3 ± 0.1a                      |

Note: All values represent the means ± standard error ( $n = 10$ ) of five replicate plots for each level of light intensity, water addition, groundwater level, fertilizer type, and rhizosphere soil type. Different letters indicate significant differences among the levels of the five treatments (one-way ANOVA,  $p < 0.05$ ). Soil physical and chemical indexes include soil temperature (°C), soil water content (v/v%), soil pH, nitrate-N (NO<sub>3</sub>-N, mg/kg), soil ammonium-N (NH<sub>4</sub><sup>+</sup>-N, mg/kg), inorganic N (mg/kg), soil total nitrogen (g/kg), soil total phosphorus (m/kg), and Soil total potassium (g/kg) which are not provided in other figures and tables. The bold parts in the table represent the control treat.
